# Supplementary material for: Porous graphene/CNT@metal (hydr)oxide composite films achieving fast ion and electron kinetics for asymmetric supercapacitors with ultra-high volumetric performance
Source: Royal Society of Chemistry journal article supplement (doi:10.1039/d3qi01792c), 2023-11-29
Supplement: d3qi01792c1.pdf [file d3qi01792c1.pdf]

## Supplementary Information

### **Porous Graphene/CNT@Metal (Hydr)oxide Composite Films Achieving Fast Ion and Electron Kinetics for Asymmetric Supercapacitors with Ultra-High Volumetric Performance**

*Chunjuan Qiu<sup>a</sup>, Baoquan Hou<sup>a</sup>, Lili Jiang<sup>a,\*</sup>, Huimin Shi<sup>a</sup>, Jie Chen<sup>b</sup>, Xiaoming Zhou<sup>c</sup>,  
Xuena Lu<sup>d</sup>, Jian Shi<sup>e</sup>, Lizhi Sheng<sup>c,f,\*</sup>*

<sup>a</sup>Key Laboratory for Special Functional Materials in Jilin Provincial Universities, Jilin Institute of Chemical Technology, Jilin 132022, P. R. China.

<sup>b</sup>Center of Characterization and Analysis, Jilin Institute of Chemical Technology, Jilin 132022, P. R. China.

<sup>c</sup>Wood Material Science and Engineering Key Laboratory of Jilin Province, Beihua University, Jilin 132013, P. R. China.

<sup>d</sup>RiseSun MengGuLi New Energy Science & Technology Co., Ltd., Beijing 102299, P. R. China.

<sup>e</sup>Hubei Key Laboratory of Low Dimensional Optoelectronic Materials and Devices, Hubei University of Arts and Science, Xiangyang 441053, P. R. China.

<sup>f</sup>Department of Materials Science and Engineering, National University of Singapore, Singapore 117574, Singapore.

\*Corresponding author: [jianglidipper@126.com](mailto:jianglidipper@126.com) (L. Jiang); [shengli\\_zhi@126.com](mailto:shengli_zhi@126.com) (L. Sheng).

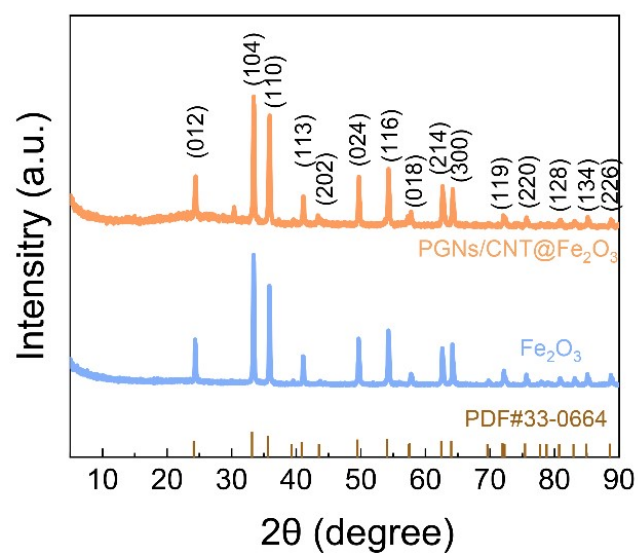

Fig. S1 XRD spectrum of PGNs/CNT@Fe<sub>2</sub>O<sub>3</sub> film.

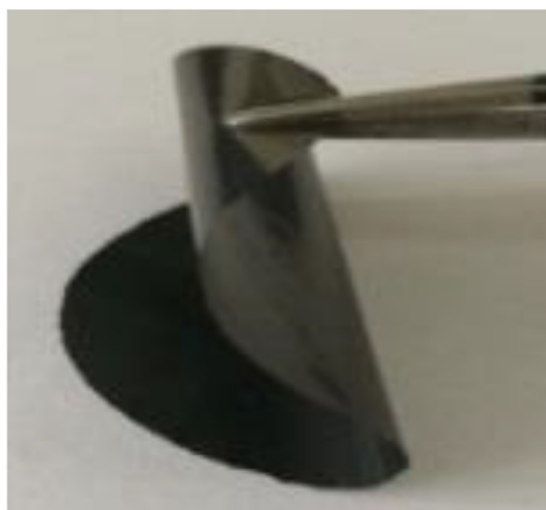

Fig. S2 Physical image of PGNs/CNT@Fe<sub>2</sub>O<sub>3</sub> film under bending.

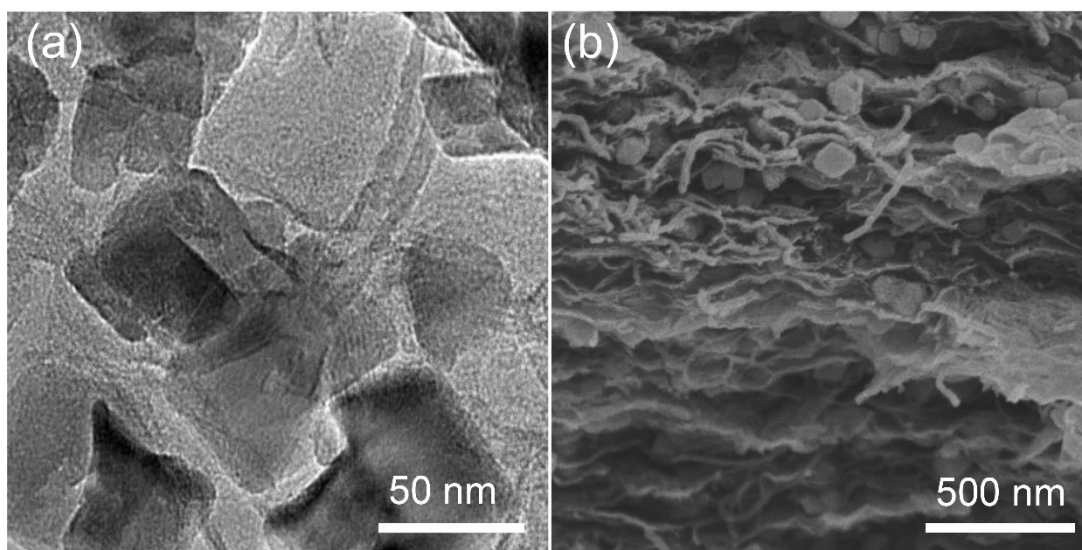

Fig. S3 (a) TEM and (b) SEM image of the PGNs/CNT@Fe<sub>2</sub>O<sub>3</sub> film.

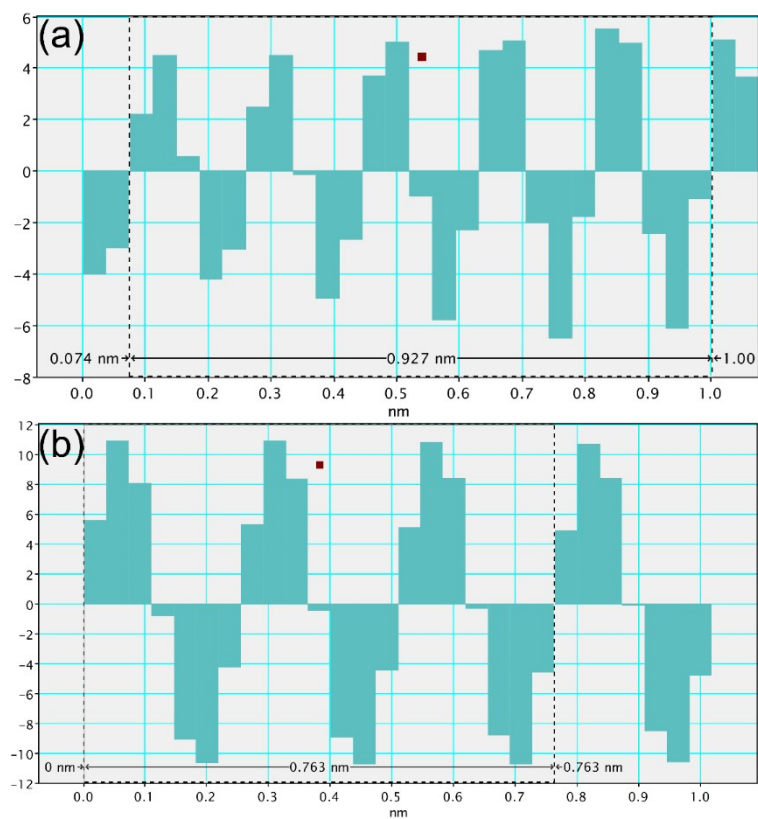

Fig. S4 (a, b) Lattice spacing diagram of PGNs/CNT@Fe<sub>2</sub>O<sub>3</sub> film.

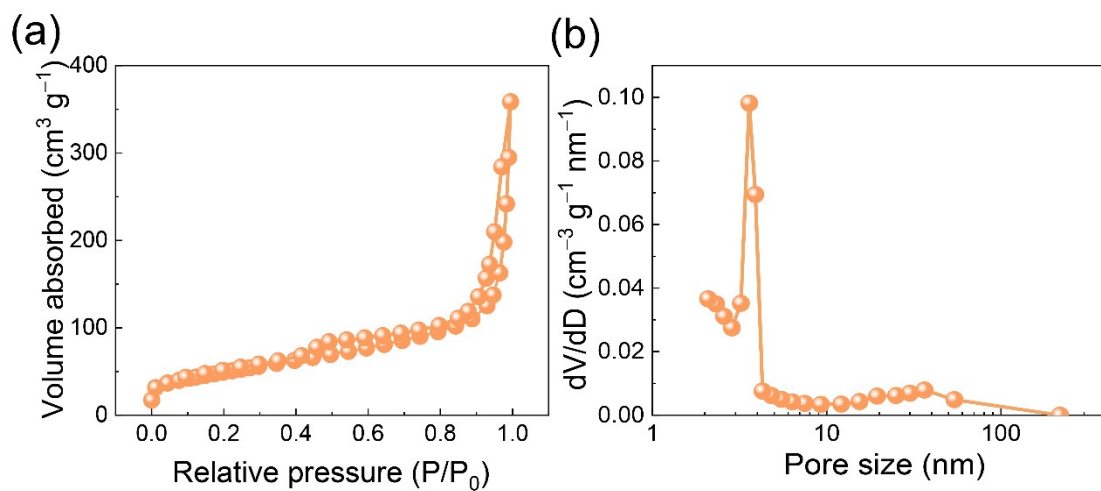

Fig. S5 (a) N<sub>2</sub> adsorption/desorption isotherms and (b) pore-size distribution curves of PGNs/CNT@Fe<sub>2</sub>O<sub>3</sub> film.

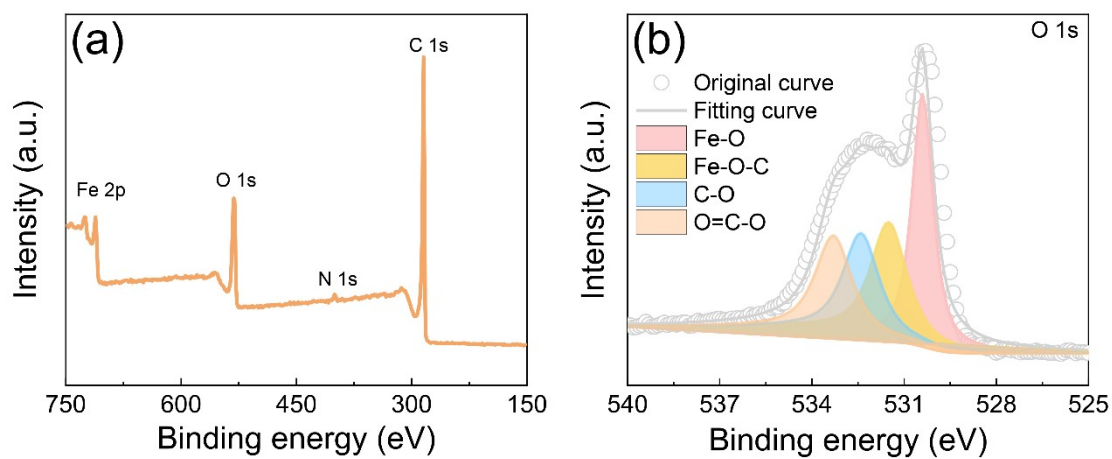

Fig. S6 (a) XPS spectrum of PGNs/CNT@Fe<sub>2</sub>O<sub>3</sub> film. (b) O 1s high-resolution XPS spectra of PGNs/CNT@Fe<sub>2</sub>O<sub>3</sub> film.

Table S1. The chemical composition of PGNs/CNT@Fe<sub>2</sub>O<sub>3</sub> film.

| Sample                                  | C 1s At.% | O 1s At.% | N 1s At.% | Fe 1s At.% |
|-----------------------------------------|-----------|-----------|-----------|------------|
| PGNs/CNT@Fe <sub>2</sub> O <sub>3</sub> | 79.71     | 15.06     | 1.25      | 3.98       |

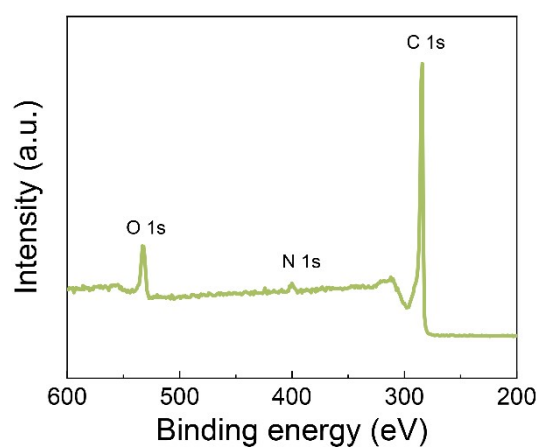

Fig. S7 N 1s high-resolution XPS spectra of PGNs.

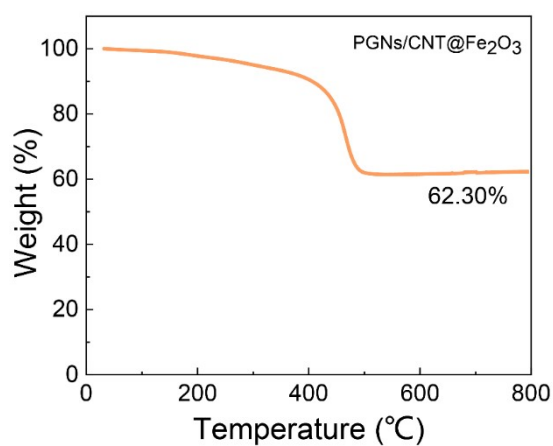

Fig. S8 Thermogravimetric spectra of PGNs/CNT@Fe<sub>2</sub>O<sub>3</sub> film.

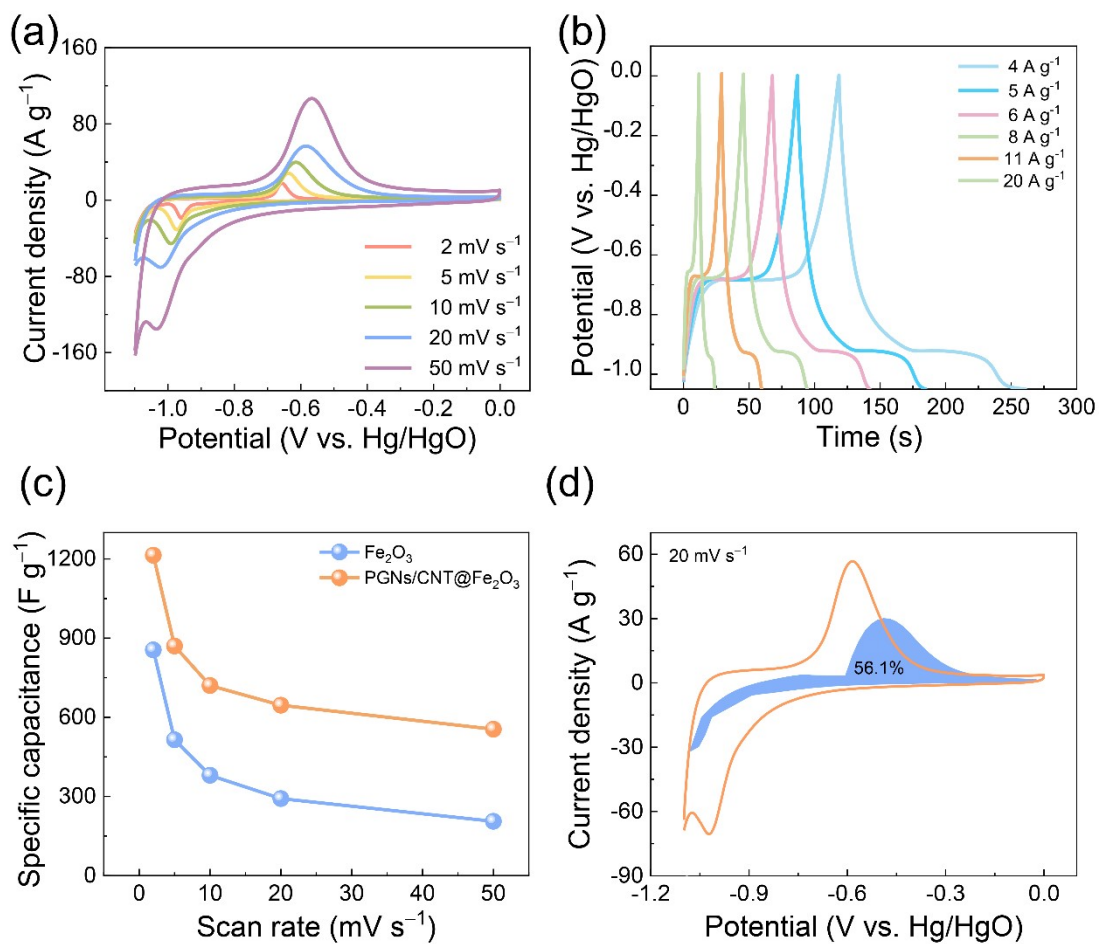

Fig. S9 (a) CV and (b) GCD of PGNs/CNT@Fe<sub>2</sub>O<sub>3</sub> film. (c) Gravimetric capacitance of Fe<sub>2</sub>O<sub>3</sub> and PGNs/CNT@Fe<sub>2</sub>O<sub>3</sub> film. (d) PGNs/CNT@Fe<sub>2</sub>O<sub>3</sub> at 20 mV s<sup>-1</sup> with  $k_1v$  outlined into red area based on  $i(V)=k_1v + k_2v^{1/2}$ .

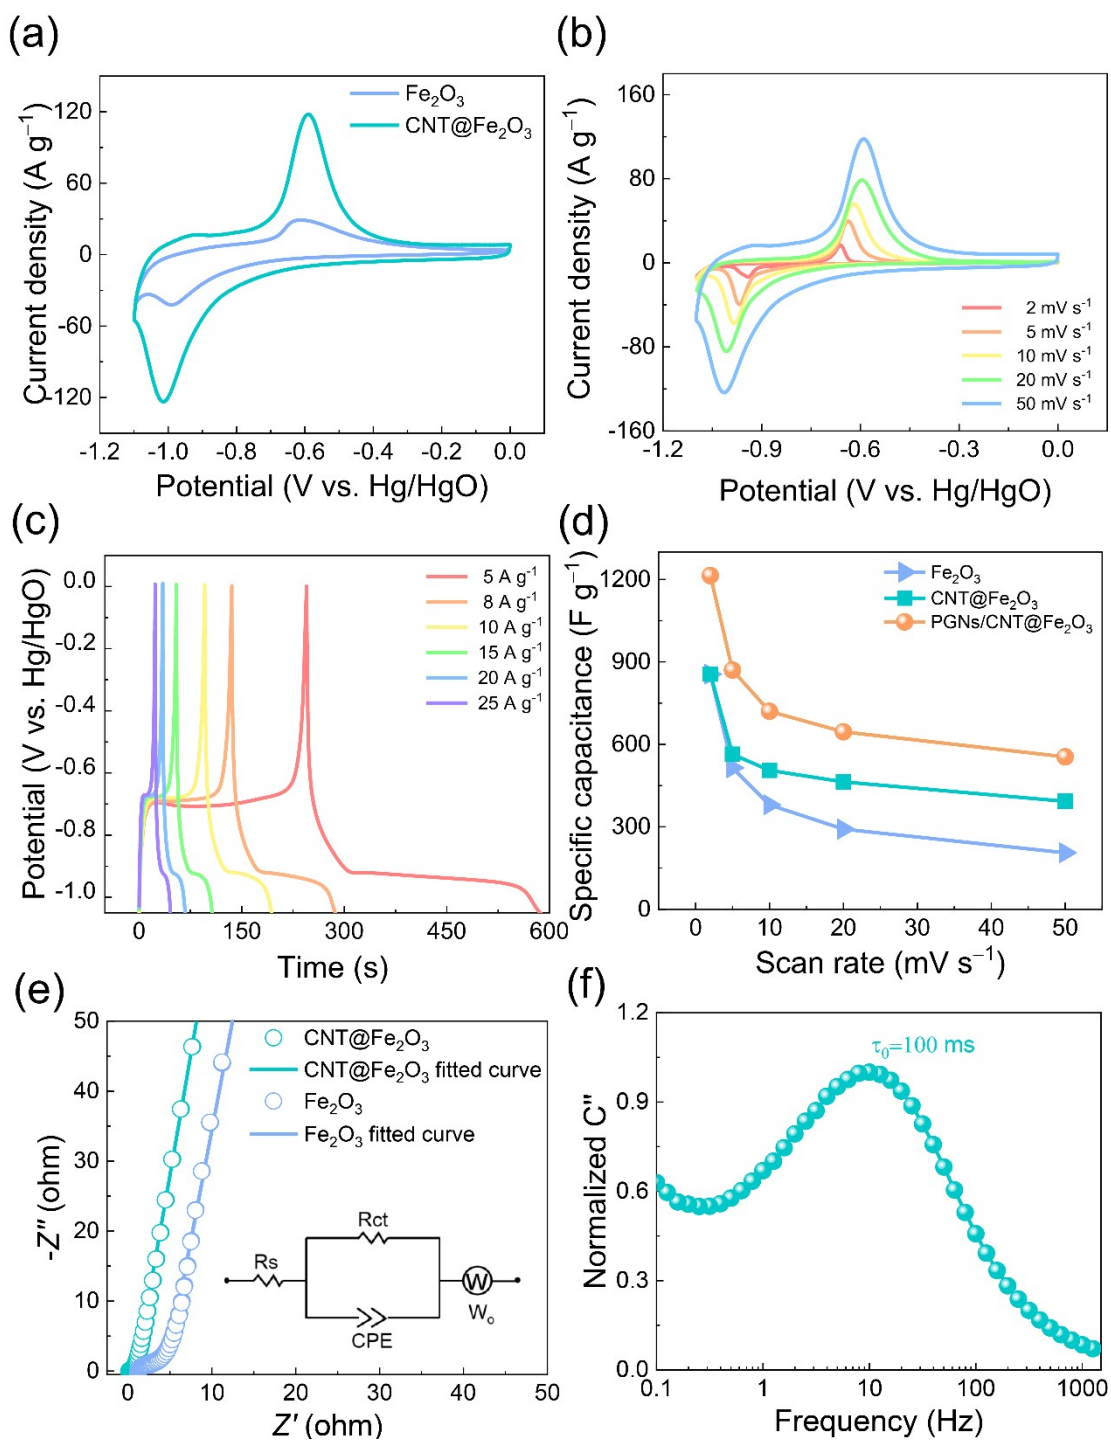

Fig. S10 (a) At  $50 \text{ mV s}^{-1}$ , the CV curves of  $\text{Fe}_2\text{O}_3$  and  $\text{PGNs/CNT@Fe}_2\text{O}_3$  film. (b) CV curve and (c) GCD curve of  $\text{CNT@Fe}_2\text{O}_3$ . (d) Gravimetric capacitance of  $\text{Fe}_2\text{O}_3$ ,  $\text{CNT@Fe}_2\text{O}_3$  and  $\text{PGNs/CNT@Fe}_2\text{O}_3$  film. (e) Nyquist plots of  $\text{Fe}_2\text{O}_3$  and  $\text{CNT@Fe}_2\text{O}_3$  film. (f)  $\tau_0$  (ms) of  $\text{CNT@Fe}_2\text{O}_3$ .

Table S2 The  $R_s$  and  $R_{ct}$  of PGNs/CNT@Fe<sub>2</sub>O<sub>3</sub>, CNT@Fe<sub>2</sub>O<sub>3</sub> and Fe<sub>2</sub>O<sub>3</sub> fitted through an equivalent circuit.

| Sample                                  | $R_s$ ( $\Omega$ ) | $R_{ct}$ ( $\Omega$ ) |
|-----------------------------------------|--------------------|-----------------------|
| PGNs/CNT@Fe <sub>2</sub> O <sub>3</sub> | 0.033              | 0.29                  |
| CNT@Fe <sub>2</sub> O <sub>3</sub>      | 0.16               | 0.06                  |
| Fe <sub>2</sub> O <sub>3</sub>          | 1.2                | 1.5                   |

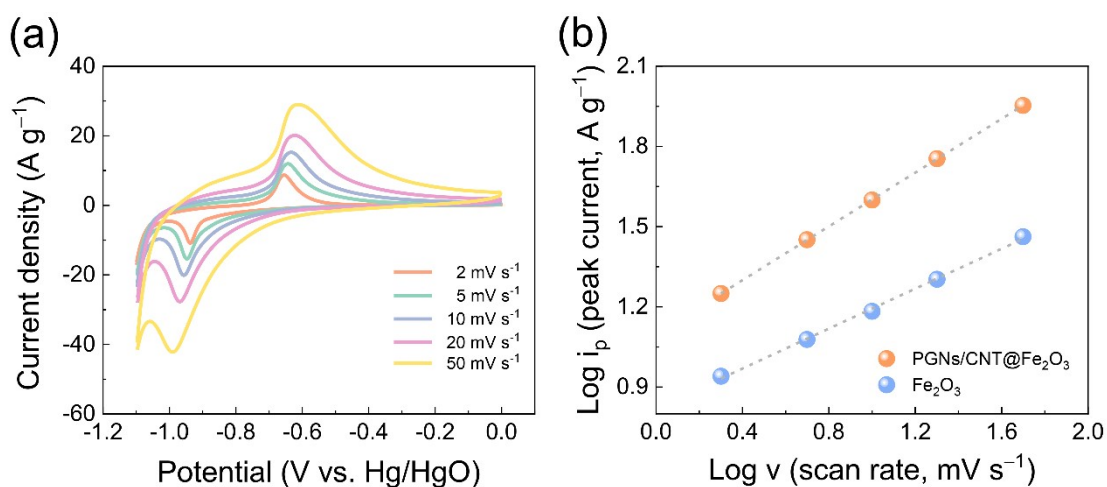

Fig. S11 (a) CV and (b) Power law dependence of log current on log scan rate of Fe<sub>2</sub>O<sub>3</sub>.

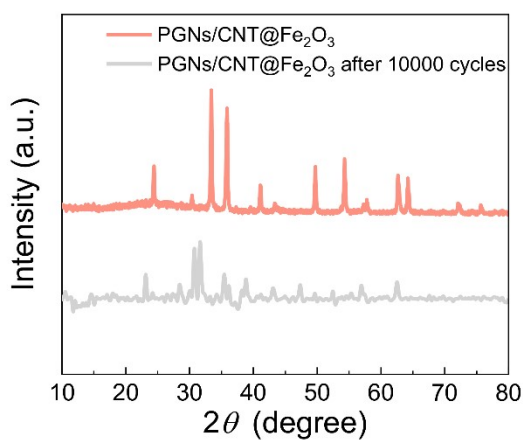

Fig. S12 XRD patterns of PGNs/CNT@Fe<sub>2</sub>O<sub>3</sub> film before and after 10,000 cycles.



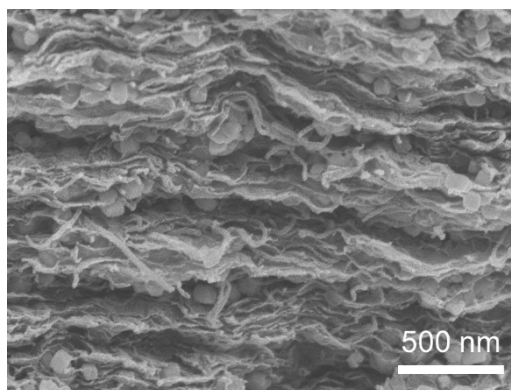

Fig. S13 Cross-sectional SEM image of the PGNs/CNT@Fe<sub>2</sub>O<sub>3</sub> film after 10000 cycles.

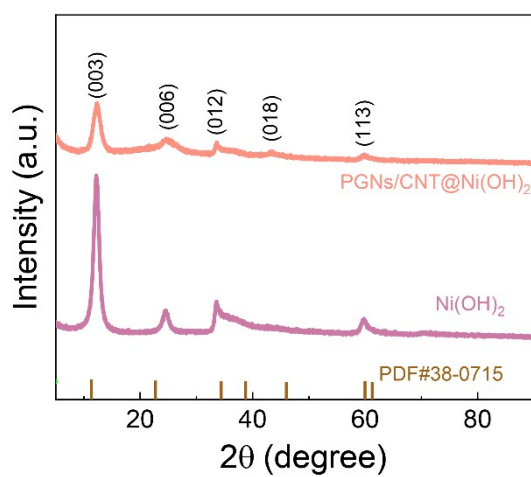

Fig. S14 XRD spectrum of PGNs/CNT@Ni(OH)<sub>2</sub> film.

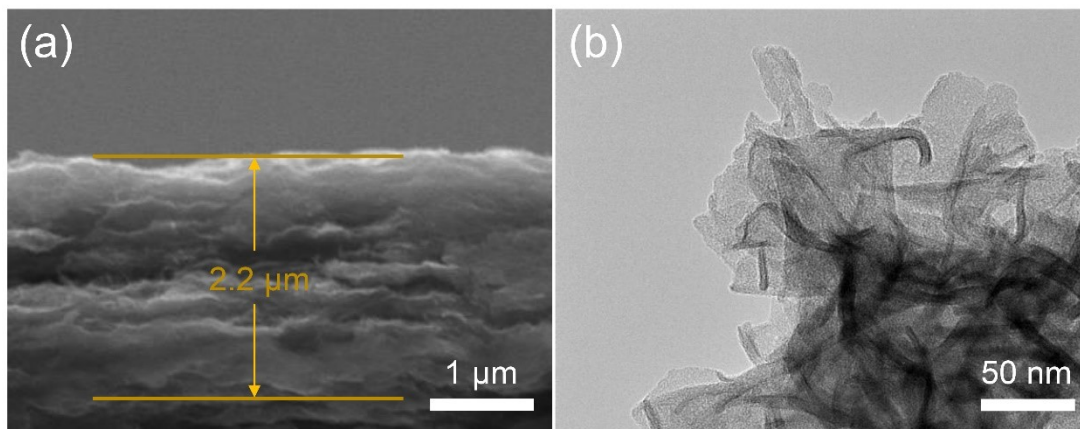

Fig. S15 (a) SEM and (b) TEM image of the PGNs/CNT@Ni(OH)<sub>2</sub> film.

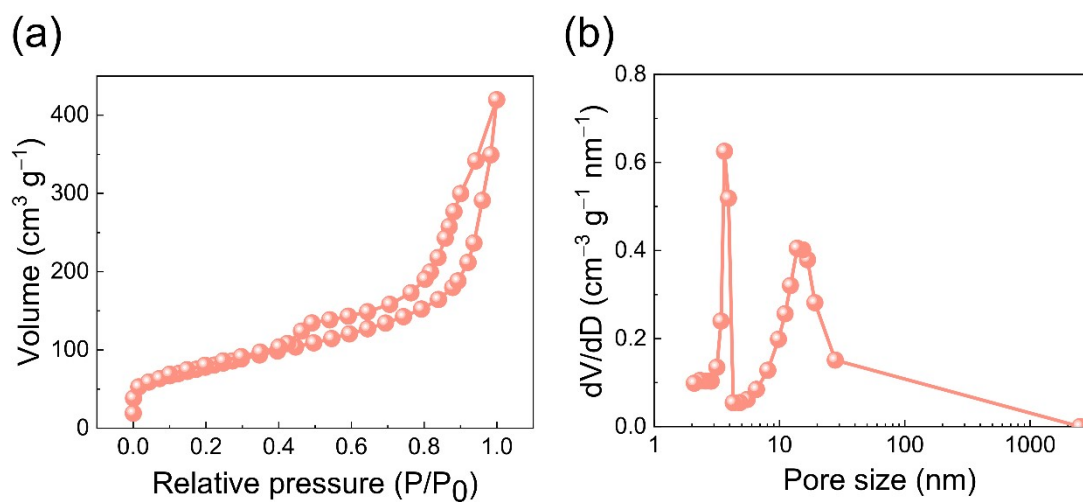

Fig. S16 (a) N<sub>2</sub> adsorption/desorption isotherms and (b) pore-size distribution curves of PGNs/CNT@Ni(OH)<sub>2</sub> film.

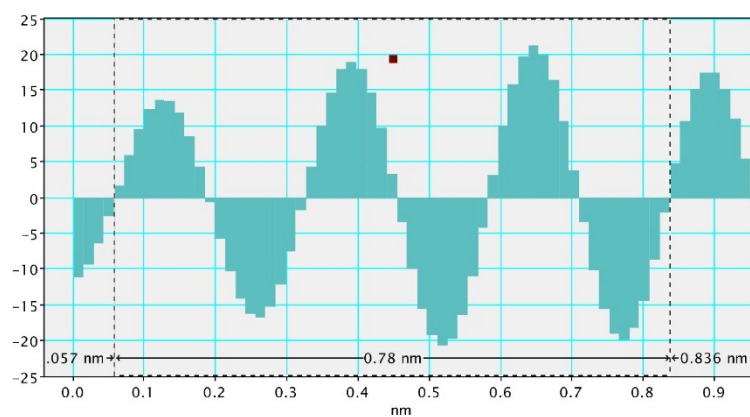

Fig. S17 Lattice spacing diagram of PGNs/CNT@Ni(OH)<sub>2</sub> film.

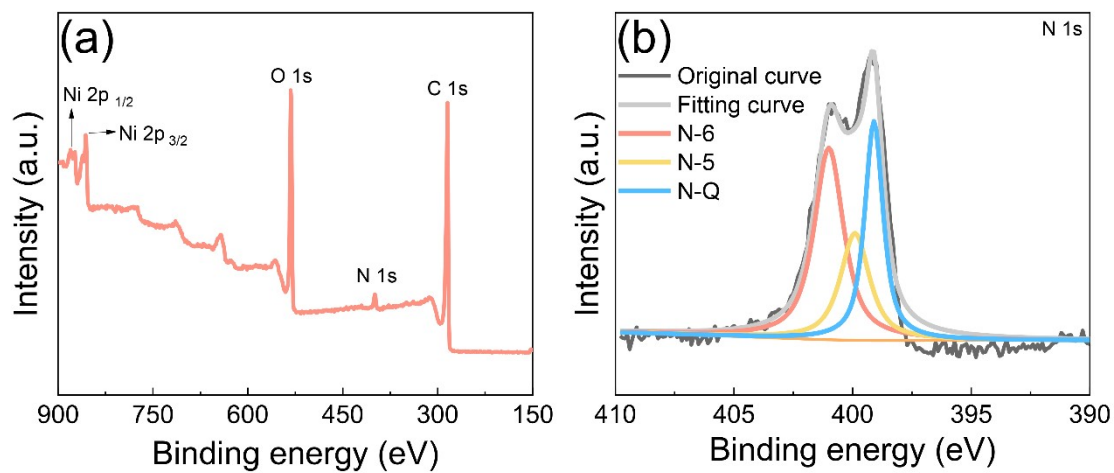

Fig. S18 (a) XPS spectrum of PGNs/CNT@Ni(OH)<sub>2</sub> film. (b) N 1s high-resolution XPS spectra of PGNs/CNT@Ni(OH)<sub>2</sub> film.

Table S3. The chemical composition of PGNs/CNT@Ni(OH)<sub>2</sub> film.

| Sample                       | C 1s At.% | O 1s At.% | N 1s At.% | Ni 1s At.% |
|------------------------------|-----------|-----------|-----------|------------|
| PGNs/CNT@Ni(OH) <sub>2</sub> | 71.56     | 21.38     | 2.68      | 4.37       |

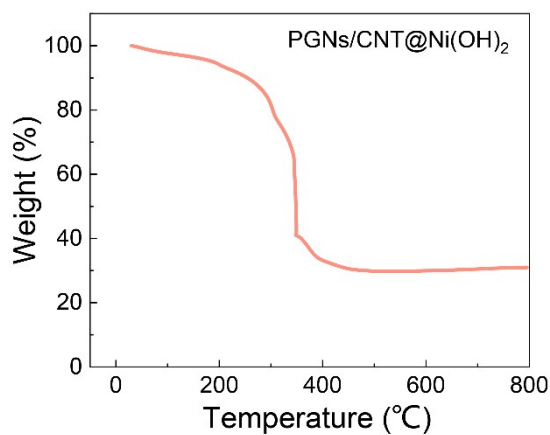

Fig. S19 Thermogravimetric spectra of PGNs/CNT@Ni(OH)<sub>2</sub> film.

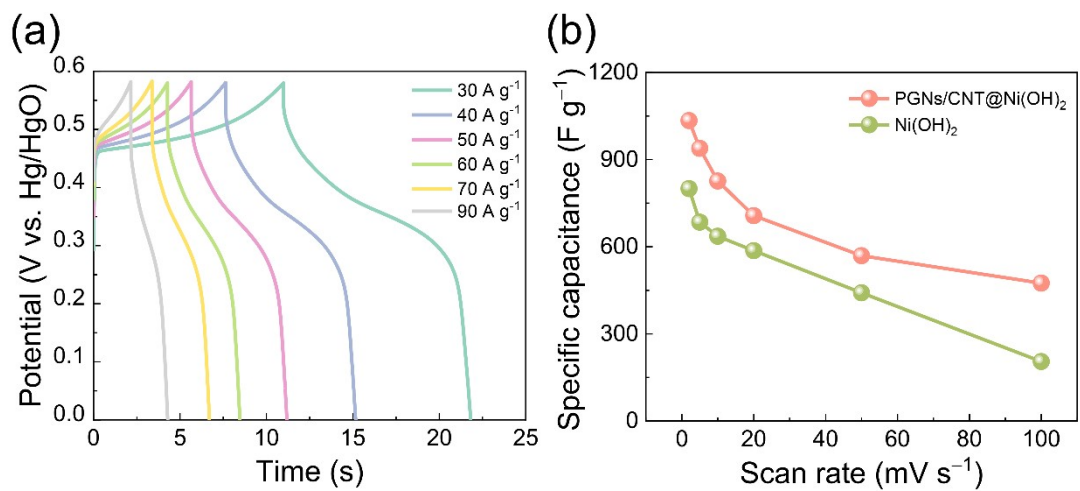

Fig. S20 (a) GCD curves of PGNs/CNT@Ni(OH)<sub>2</sub>. (b) The gravimetric capacitance of Ni(OH)<sub>2</sub> and PGNs/CNT@Ni(OH)<sub>2</sub>.

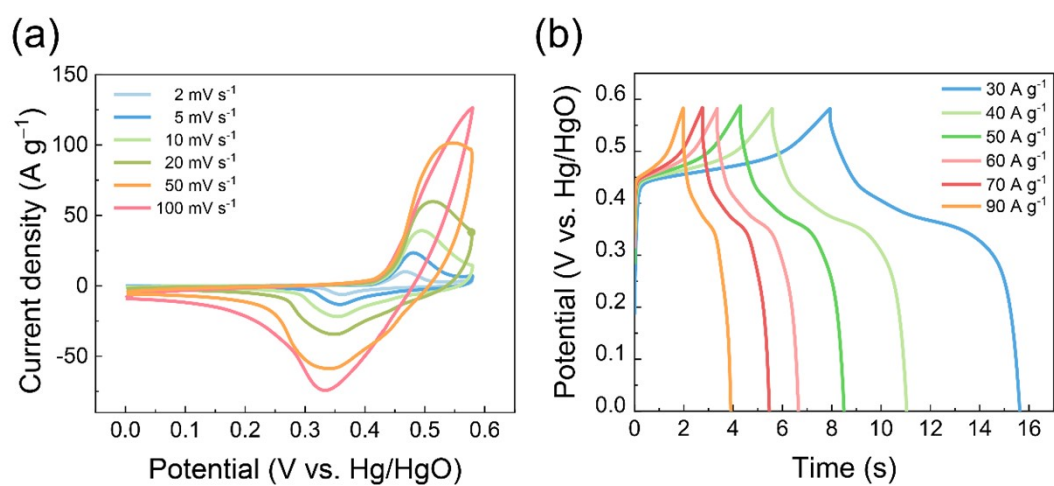

Fig. S21 (a) CV and (b) GCD curves of Ni(OH)<sub>2</sub>.

Table S4 The  $R_s$  and  $R_{ct}$  of PGNs/CNT@Ni(OH)<sub>2</sub> film and Ni(OH)<sub>2</sub> fitted through an equivalent circuit.

| Sample                       | $R_s$ | $R_{ct}$ |
|------------------------------|-------|----------|
| PGNs/CNT@Ni(OH) <sub>2</sub> | 0.05  | 0.59     |
| Ni(OH) <sub>2</sub>          | 0.1   | 1        |

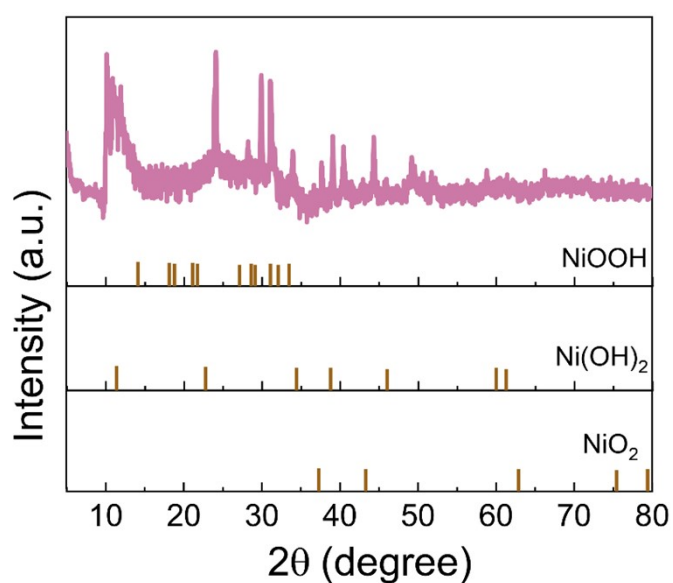

Fig. S22. The XRD test of PGNs/CNT@Ni(OH)<sub>2</sub> after cycling.

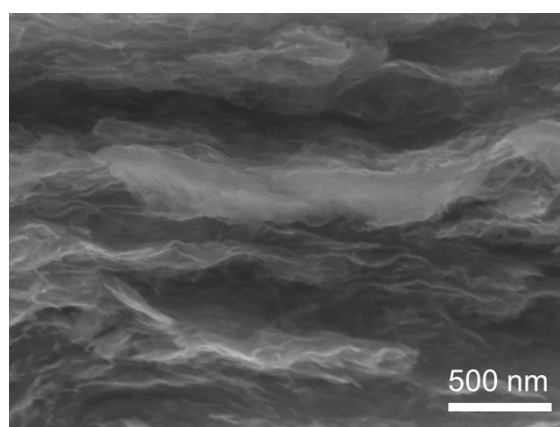

Fig. S23 Cross-sectional SEM image of the PGNs/CNT@Ni(OH)<sub>2</sub> film after 10000 cycles.

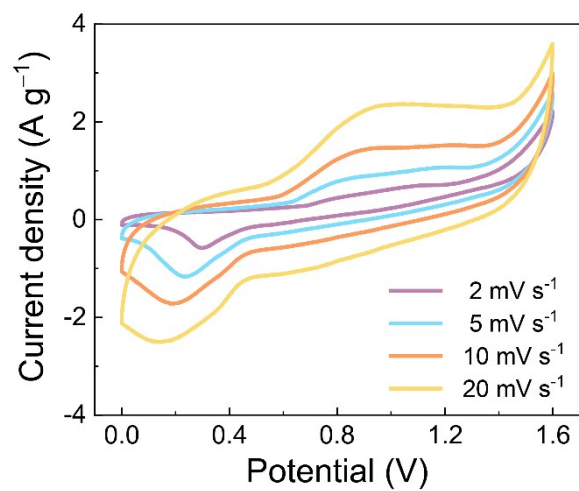

Fig. S24 (a) CV curves of PGNs/CNT@Ni(OH)<sub>2</sub>//PGNs/CNT@Fe<sub>2</sub>O<sub>3</sub> ASC.

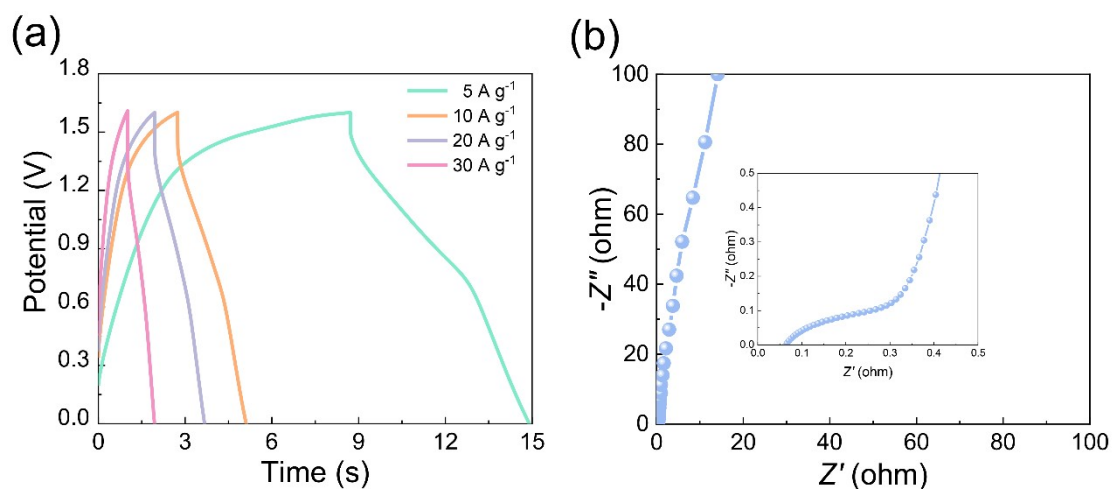

Fig. S25 (a) GCD curves and (b) Nyquist plots of PGNs/CNT@Ni(OH)<sub>2</sub>//PGNs/CNT@Fe<sub>2</sub>O<sub>3</sub> ASC.

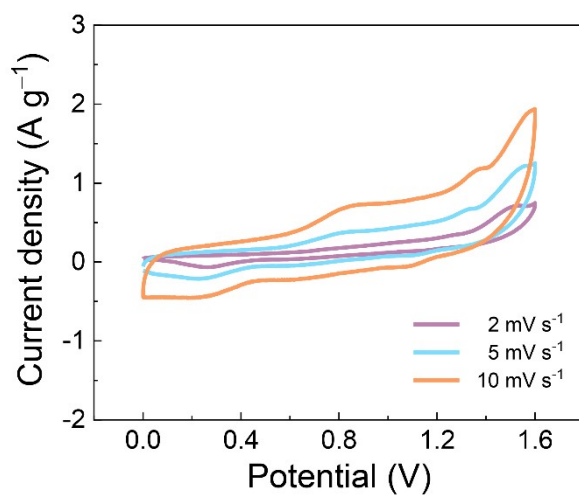

Fig. S26 CV curves of all-solid-state PGNs/CNT@Ni(OH)<sub>2</sub>//PGNs/CNT@Fe<sub>2</sub>O<sub>3</sub> ASC.
